# Supplementary material for: Reference-based compression of short-read sequences using path encoding
Source: PubMed Central journal article supplement (PMC4481695; doi:10.1093/bioinformatics/btv071), 2015-02-02
Supplement: supp_btv071_Kingsford-Patro-supp.pdf [file supp_btv071_Kingsford-Patro-supp.pdf]

# Supplementary Material For: Reference-based compression of short-read sequences using path encoding

Carl Kingsford and Rob Patro

## 1. Running times

All times and memory usages in these supplementary tables were obtained on a shared computer with 16 Intel Xeon 2.60GHz CPUs with 256Gb of RAM. SCALCE, fastqz, and PathEncode (version 0.6.3) were run as described in the main text. “PE User & Sys” gives the single-threaded time spent with system and user-level code. The time for CRAM is broken into alignment/samtools indexing and the actual compression.

**Supplementary Table 1.** Detailed running times for compressing the test files (in seconds).

| Data       | PathEncode | PE User & Sys | SCALCE | Fastqz | CRAM <sup>a</sup> |
|------------|------------|---------------|--------|--------|-------------------|
| SRR037452  | 361        | 581           | 42     | 170    | 497 = 280 + 217   |
| SRR445718  | 1344       | 2127          | 251    | 1161   | 1095 = 395 + 700  |
| SRR490961  | 1979       | 3209          | 371    | 1750   | 1509 = 462 + 1047 |
| SRR635193  | 1250       | 1977          | 240    | 1244   | 1411 = 604 + 807  |
| SRR1294122 | 1751       | 2795          | 294    | 1404   | 1218 = 447 + 771  |
| SRR689233  | 1200       | 1752          | 208    | 1178   | 1464 = 373 + 1091 |
| SRR519063  | 939        | 1398          | 413    | 1070   | 1602 = 346 + 1256 |

<sup>a</sup> CRAM running times are in the format total = (cram) + (bowtie & samtools).

**Supplementary Table 2.** Detailed running times for decompressing the test files (in seconds).

| Data       | PathEncode | PE User & Sys | SCALCE | Fastqz | CRAM |
|------------|------------|---------------|--------|--------|------|
| SRR037452  | 201        | 346           | 26     | 201    | 155  |
| SRR445718  | 1185       | 1437          | 172    | 1168   | 270  |
| SRR490961  | 1619       | 1933          | 277    | 1757   | 343  |
| SRR635193  | 1135       | 1304          | 121    | 1279   | 398  |
| SRR1294122 | 1417       | 1728          | 221    | 1356   | 326  |
| SRR689233  | 1212       | 1351          | 118    | 1199   | 303  |
| SRR519063  | 797        | 860           | 113    | 1187   | 284  |

## 2. Memory usage

The memory usage of each of the commands was measured using the `rusage` system call. All numbers are in kilobytes.

**Supplementary Table 3.** Memory usage for compressing the test files (in kB).

| Data       | PathEncode | SCALCE    | Fastqz    | CRAM       |
|------------|------------|-----------|-----------|------------|
| SRR037452  | 6,674,692  | 2,179,216 | 1,393,936 | 10,728,200 |
| SRR445718  | 16,894,448 | 5,395,132 | 1,518,884 | 10,516,800 |
| SRR490961  | 23,815,172 | 5,390,896 | 1,563,904 | 10,531,092 |
| SRR635193  | 14,421,252 | 5,405,492 | 1,387,796 | 10,538,524 |
| SRR1294122 | 19,548,580 | 5,395,184 | 1,467,556 | 10,522,252 |
| SRR689233  | 13,338,780 | 5,368,152 | 1,494,000 | 10,538,344 |
| SRR519063  | 13,792,636 | 5,356,136 | 1,563,904 | 10,530,808 |

**Supplementary Table 4.** Memory usage for decompressing the test files (in kB).

| Data       | PathEncode | SCALCE    | Fastqz    | CRAM       |
|------------|------------|-----------|-----------|------------|
| SRR037452  | 9,635,088  | 1,066,732 | 1,394,144 | 11,950,456 |
| SRR445718  | 16,419,684 | 1,066,140 | 1,519,088 | 11,547,352 |
| SRR490961  | 16,156,764 | 1,066,684 | 1,564,112 | 11,272,636 |
| SRR635193  | 13,786,892 | 1,065,316 | 1,387,852 | 11,899,680 |
| SRR1294122 | 16,677,436 | 1,067,248 | 1,485,488 | 11,722,704 |
| SRR689233  | 14,509,168 | 1,067,580 | 1,494,228 | 10,804,052 |
| SRR519063  | 9,431,372  | 1,066,032 | 1,564,116 | 10,619,432 |

## 3. Larger memory variant

Our implementation includes an alternative data structure to maintain the kmer counts. This variant uses more memory, but is faster (particularly for decompression). This mode, which produces the same compression as the standard mode, is suitable for use on large-memory machines.

**Supplementary Table 5.** Times and memory usage for the larger-memory implementation.

| Data       | Compression |             | Decompression |             |
|------------|-------------|-------------|---------------|-------------|
|            | Time (s)    | Memory (kb) | Time (s)      | Memory (kb) |
| SRR037452  | 312         | 19,106,296  | 131           | 25,174,288  |
| SRR445718  | 1106        | 23,236,324  | 735           | 28,475,596  |
| SRR490961  | 1568        | 25,674,868  | 1016          | 31,700,676  |
| SRR635193  | 919         | 21,434,852  | 616           | 27,182,760  |
| SRR1294122 | 1349        | 25,008,828  | 874           | 30,094,116  |
| SRR689233  | 820         | 22,890,932  | 640           | 25,854,564  |
| SRR519063  | 708         | 21,854,032  | 490           | 25,679,332  |

## 4. Effect of observation multiplier on compression

Path encoding by default updates counts of transitions using a multiplier of  $m = 10$  (Equation 2 in the main text). Using the `-mul` option, this can be changed to experiment with other weights. The effect of larger  $m$  values is to “forget” the initial reference counts more quickly (but errors seen multiple times will have a larger impact).

**Supplementary Table 6.** Effect of observation multiplier on compression.

| Data set   | Size $m = 10$ | Size $m = 20$ |
|------------|---------------|---------------|
| SRR037452  | 43,105,624    | 43,415,969    |
| SRR445718  | 154,960,810   | 156,530,538   |
| SRR490961  | 170,613,303   | 171,548,006   |
| SRR635193  | 187,256,974   | 190,117,465   |
| SRR1294122 | 187,808,066   | 188,908,923   |
| SRR689233  | 167,659,551   | 171,062,836   |
| SRR519063  | 84,642,682    | 85,405,469    |
